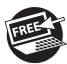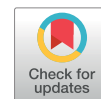

# Erratum

**Erratum. Genetics coming of age in type 1 diabetes. Diabetes Care 2019;42:189–191**

<https://doi.org/10.2337/dc09-19er05>

*Karen Cerosaletti, Wei Hao, and  
Carla J. Greenbaum*

In the article cited above, the surname of author Karen Cerosaletti was misspelled as Cerolsaletti in the author list. The online version of the article has been corrected.
